# Supplementary material
Source: PubMed Central journal article supplement (PMC4330968)
Supplement: NIHMS658990-supplement-supplement_1.pdf [file NIHMS658990-supplement-supplement_1.pdf]

## Appendices

Supplemental Table A. *Correlation Matrix between TUG tasks and Attention and Executive*

*Function tasks.* Cohen [31] suggested that  $r = .1$  represents a small association,  $r = .3$  represents a medium association, and  $r = .5$  represents a large association between variables in the social and behavioral sciences.

| Cognitive Test    | TUG      | TUG-manual | TUG-cognitive |
|-------------------|----------|------------|---------------|
| RBANS Coding      | -0.47*** | -0.46***   | -0.58***      |
| RBANS Fluency     | -0.31**  | -0.31**    | -0.31**       |
| RBANS Digit Span  | -0.15    |            | -0.20*        |
| RBANS Figure Copy | -0.34*** | -0.27**    | -0.31**       |
| Animal Fluency    | -0.25**  | -0.22*     | -0.23*        |
| Clock Draw        | -0.14    | -0.10      | -0.21*        |
| MMSE              | -0.30**  | -0.31**    | -0.37***      |
| MoCA              | -0.33**  | -0.21      | -0.41**       |
| Serial 7's        | -0.25*   | -0.26      | -0.29**       |
| Trails A          | 0.27**   | 0.37***    | 0.38***       |
| Trails B          | 0.28**   | 0.19       | 0.30**        |
| Ex Fx Comp        | -0.36*** | -0.28**    | -0.39***      |

Note. TUG = Timed Up and Go task, TUGman = Timed Up and Go task while carrying a cup of water, TUGcog = Timed Up and Go while counting backward from 50 by 1's, ExFx Comp = Executive Function composite score; \* $p < 0.05$ . \*\* $p < 0.01$ . \*\*\* $p < 0.001$
